# Supplementary material
Source: HighWire-hosted journal article supplement (https://www.cmajopen.ca/highwire/filestream/81013/field_highwire_adjunct_files/6/open-2015-0105-6-at.pdf)
Supplement: open-2015-0105-6-at.pdf [file open-2015-0105-6-at.pdf]

**Appendix 6 (as supplied by the authors):** Proportion of adults (secondary analysis) receiving rehabilitation by mechanism of injury in the Terres-Cries-de-la-Baie-James.

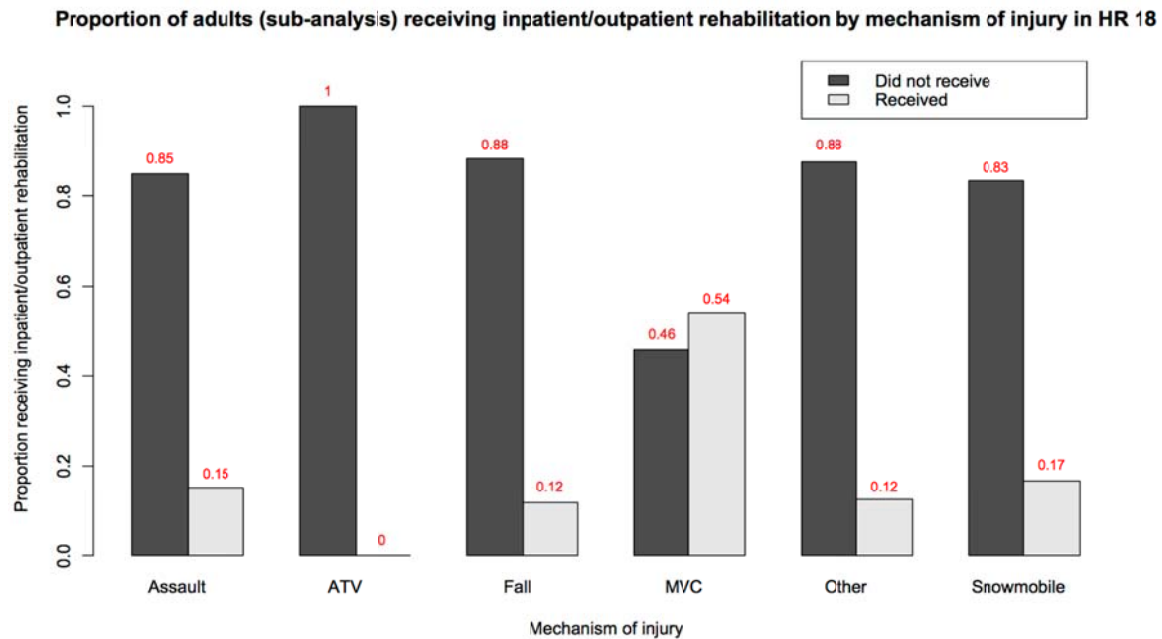

Adult patients that were involved in motor vehicle collisions were more likely to receive rehabilitation than all other mechanisms of injury. ATV = all-terrain vehicle collision, HR 18 = Terres-Cries-de-la-Baie-James health region, MVC = motor vehicle collision.
